# Supplementary material
Source: PubMed Central journal article supplement (PMC3748986)
Supplement: jbjs_95_11_1020_ds01.pdf [file jbjs_95_11_1020_ds01.pdf]

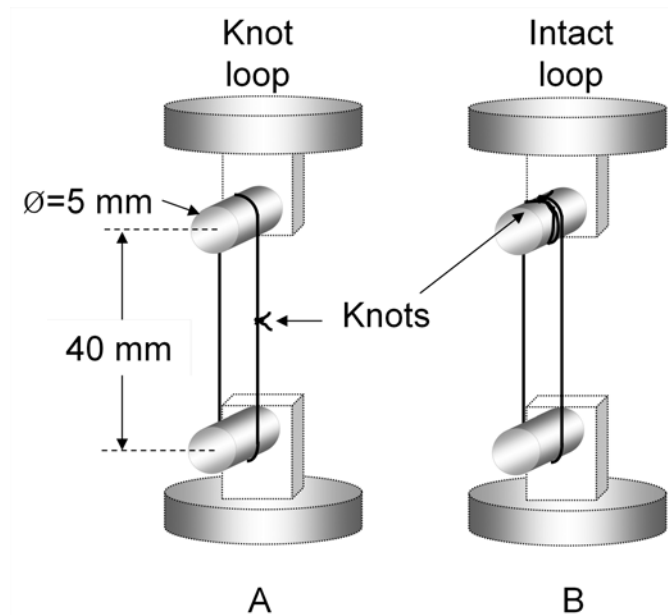

Fig. E-1

**Fig. E-1A** Knot holding-strength testing. The suture loop is mounted on the testing machine with the knot located in the middle. **Fig. E-1B** Suture strength testing. To avoid failure at the knot site, the suture is wrapped around a hooking rod four times, with an 8-throw square knot buried within the suture loops.

TABLE E-1 Failure Mode of Suture Loops According to Suture Material and Knot Configuration

| Configuration       | Suture Material | Failure (no.)                |                           |                             |
|---------------------|-----------------|------------------------------|---------------------------|-----------------------------|
|                     |                 | Suture Break at Midsubstance | Suture Break at Knot Site | Knot Sliding and Unraveling |
| Intact loop         | FiberWire       | 10                           | 0                         | 0                           |
|                     | PDS             | 10                           | 0                         | 0                           |
|                     | Ethibond        | 10                           | 0                         | 0                           |
| TSOL knot           | FiberWire       | 0                            | 5                         | 5                           |
|                     | PDS             | 0                            | 10                        | 0                           |
|                     | Ethibond        | 0                            | 10                        | 0                           |
| 4-throw square knot | FiberWire       | 0                            | 0                         | 10                          |
|                     | PDS             | 0                            | 3                         | 7                           |
|                     | Ethibond        | 0                            | 1                         | 9                           |
